# Supplementary material
Source: MDPI journal article supplement (https://www.mdpi.com/2073-4344/11/11/1299)
Supplement: s1 [file s1 › catalysts-1430713-supplementary.pdf]

## Supplementary Documents

### Glycerol Hydrogenolysis to Produce 1,2-propanediol in Absence of Molecular Hydrogen Using a Pd Promoted Cu/MgO/Al<sub>2</sub>O<sub>3</sub> Catalyst

Yuanqing Liu<sup>1</sup>, Michael Wu<sup>1</sup>, Garry L. Rempel<sup>1†</sup>, Flora T.T. Ng<sup>1\*</sup>

<sup>1</sup>Department of Chemical Engineering, University of Waterloo, 200 University Avenue West, Waterloo, ON, Canada

\*fttng@uwaterloo.ca

† Deceased November 2, 2018, this paper is dedicated to the memory of Professor Garry L. Rempel.

**Table S1** Criteria for a Fractional Factorial Design [1]

| Number of Factors<br><i>k</i> | Fraction        | Number of Runs | Design Generators | Number of Factors<br><i>k</i> | Fraction       | Number of Runs | Design Generators |
|-------------------------------|-----------------|----------------|-------------------|-------------------------------|----------------|----------------|-------------------|
| 3                             | $2_{III}^{1-1}$ | 4              | $C = \pm AB$      | 10                            |                |                | $H = \pm ABCG$    |
| 4                             | $2_{IV}^{1-1}$  | 8              | $D = \pm ABC$     |                               |                |                | $J = \pm ACDE$    |
| 5                             | $2_{IV}^{1-1}$  | 16             | $E = \pm ABCD$    |                               | $2_V^{-3}$     | 128            | $K = \pm ACDF$    |
|                               | $2_{III}^{-2}$  | 8              | $D = \pm AB$      |                               |                |                | $G = \pm BCD$     |
|                               |                 |                | $E = \pm AC$      |                               |                |                | $H = \pm ACDF$    |
| 6                             | $2_{VI}^{-1}$   | 32             | $F = \pm ABCDE$   |                               |                |                | $J = \pm ABDE$    |
|                               | $2_{IV}^{-2}$   | 16             | $E = \pm ABC$     |                               | $2_{IV}^{-4}$  | 64             | $K = \pm ABCE$    |
|                               |                 |                | $F = \pm BCD$     |                               |                |                | $F = \pm ABCD$    |
|                               | $2_{III}^{-3}$  | 8              | $D = \pm AB$      |                               |                |                | $G = \pm ABCE$    |
|                               |                 |                | $E = \pm AC$      |                               |                |                | $H = \pm ABDE$    |
|                               |                 |                | $F = \pm BC$      |                               |                |                | $J = \pm ACDE$    |
| 7                             | $2_{VII}^{-1}$  | 64             | $G = \pm ABCDEF$  |                               | $2_{IV}^{-5}$  | 32             | $K = \pm BCDE$    |
|                               | $2_{IV}^{-2}$   | 32             | $E = \pm ABC$     |                               |                |                | $E = \pm ABC$     |
|                               |                 |                | $G = \pm ABDE$    |                               |                |                | $F = \pm BCD$     |
|                               | $2_{IV}^{-3}$   | 16             | $E = \pm ABC$     |                               |                |                | $G = \pm ACD$     |
|                               |                 |                | $F = \pm BCD$     |                               |                |                | $H = \pm ABD$     |
|                               |                 |                | $G = \pm ACD$     |                               |                |                | $J = \pm ABCD$    |
|                               | $2_{III}^{-4}$  | 8              | $D = \pm AB$      | 11                            | $2_{III}^{-6}$ | 16             | $K = \pm AB$      |
|                               |                 |                | $E = \pm AC$      |                               |                |                | $G = \pm CDE$     |
|                               |                 |                | $F = \pm BC$      |                               |                |                | $H = \pm ABCD$    |
|                               |                 |                | $G = \pm ABC$     |                               |                |                | $J = \pm ABF$     |
| 8                             | $2_V^{-2}$      | 64             | $G = \pm ABCD$    |                               |                |                | $K = \pm BDEF$    |
|                               |                 |                | $H = \pm AB$      |                               | $2_{IV}^{-5}$  | 64             | $L = \pm ADEF$    |
|                               | $2_{IV}^{-3}$   | 32             | $F = \pm ABC$     |                               |                |                | $F = \pm ABC$     |
|                               |                 |                | $G = \pm ABD$     |                               |                |                | $G = \pm BCD$     |
|                               |                 |                | $H = \pm BCDE$    |                               |                |                | $H = \pm CDE$     |
|                               | $2_{IV}^{-4}$   | 16             | $E = \pm BCD$     |                               |                |                | $J = \pm ACD$     |
|                               |                 |                | $F = \pm ACD$     |                               | $2_{IV}^{-6}$  | 32             | $K = \pm ADE$     |
|                               |                 |                | $G = \pm ABC$     |                               |                |                | $L = \pm BDE$     |
|                               |                 |                | $H = \pm ABD$     |                               |                |                | $E = \pm ABC$     |
| 9                             | $2_{VI}^{-2}$   | 128            | $H = \pm ACDFG$   |                               |                |                | $F = \pm BCD$     |
|                               |                 |                | $J = \pm BCEFG$   |                               |                |                | $G = \pm ACD$     |
|                               | $2_{IV}^{-3}$   | 64             | $G = \pm ABCD$    |                               |                |                | $H = \pm ABD$     |
|                               |                 |                | $H = \pm ACEF$    |                               |                |                | $J = \pm ABCD$    |
|                               |                 |                | $J = \pm CDEF$    |                               |                |                | $K = \pm AB$      |
|                               | $2_{IV}^{-4}$   | 32             | $F = \pm BCD$     |                               | $2_{III}^{-7}$ | 16             | $L = \pm AC$      |
|                               |                 |                | $G = \pm ACDE$    |                               |                |                |                   |
|                               |                 |                | $H = \pm ABDE$    |                               |                |                |                   |
|                               |                 |                | $J = \pm ABCE$    |                               |                |                |                   |
|                               | $2_{III}^{-5}$  | 16             | $E = \pm ABC$     |                               |                |                |                   |
|                               |                 |                | $F = \pm BCD$     |                               |                |                |                   |
|                               |                 |                | $G = \pm ACD$     |                               |                |                |                   |
|                               |                 |                | $H = \pm ABD$     |                               |                |                |                   |
|                               |                 |                | $J = \pm ABCD$    |                               |                |                |                   |

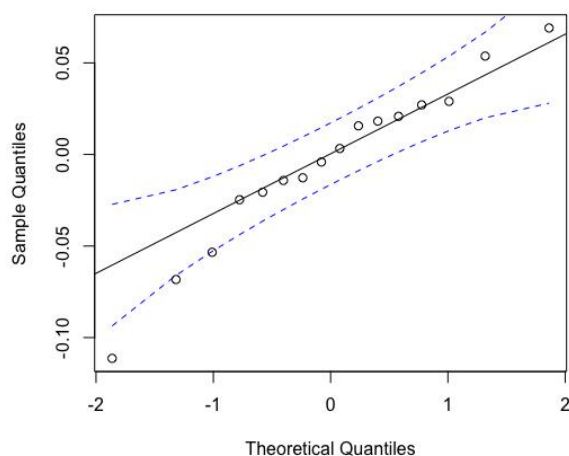

**Figure S1** The normal probability plot of residual for the glycerol hydrogenolysis process with in situ hydrogen from methanol steam reforming. Catalyst: 1Pd/Cu/MgO/Al<sub>2</sub>O<sub>3</sub>, Cu/Mg/Al (molar) = 22.5/67.5/10. Conditions: 220 °C, 15bar N<sub>2</sub>, 20 wt% Glycerol, Water/Methanol(molar)=1.2, 3 wt% catalyst, 500RPM.

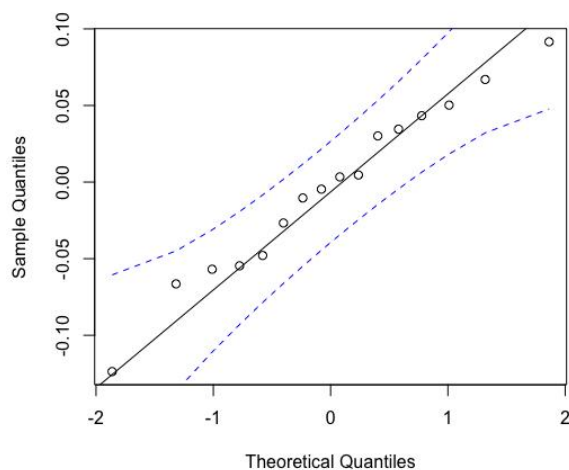

**Figure S2** The normal probability plot of residual for the glycerol hydrogenolysis process with in situ hydrogen from methanol steam reforming. Catalyst: Cu/MgO/Al<sub>2</sub>O<sub>3</sub>, Cu/Mg/Al (molar) = 22.5/67.5/10. Conditions: 220 °C, 15bar N<sub>2</sub>, 20 wt% Glycerol, Water/Methanol(molar)=1.2, 3 wt% catalyst, 500RPM.

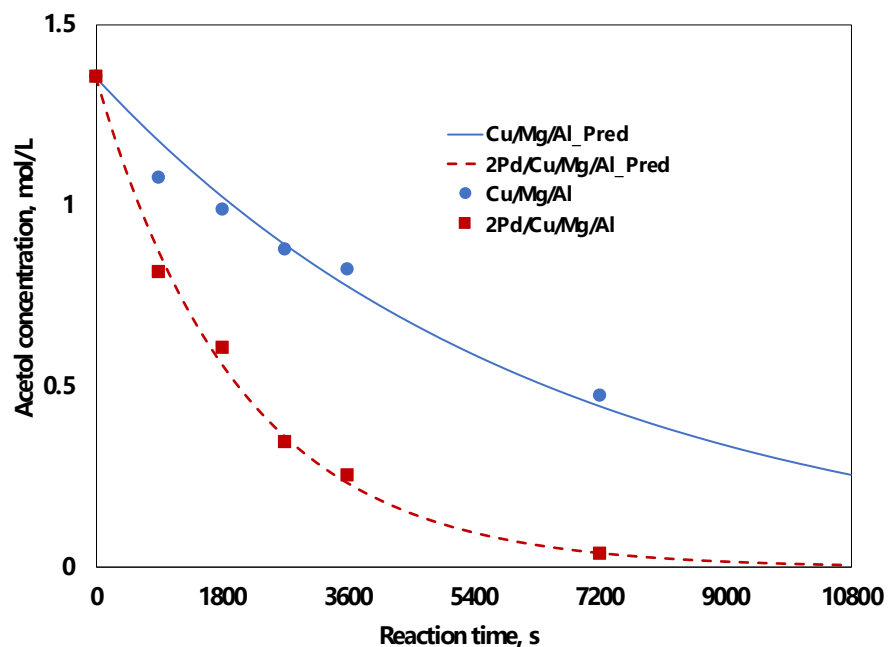

**Figure S3** The concentration of different component over the reaction time for acetol hydrogenation.

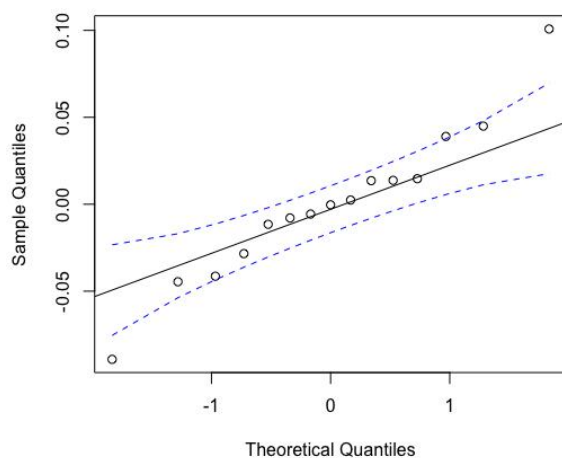

**Figure S4** The normal probability plot of residual for the acetol hydrogenation. Catalyst: Cu/MgO/Al<sub>2</sub>O<sub>3</sub>.

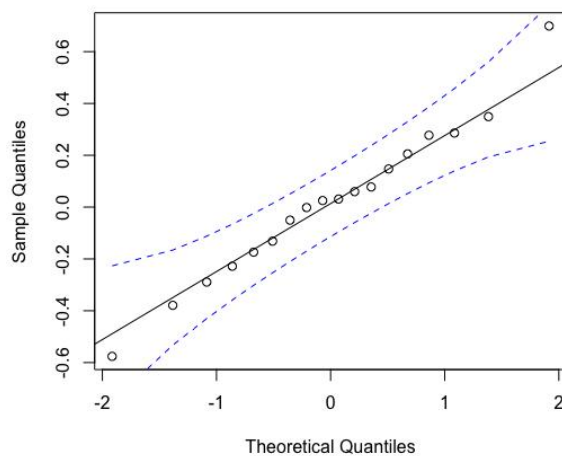

**Figure S5** The normal probability plot of residual for the acetol hydrogenation. Catalyst:  $2\text{Pd/Cu/MgO/Al}_2\text{O}_3$ .

## References

[1]. Montgomery, D.C.; Runger, G.C. In *Design of experiments with several factors*; Applied statistics and probability for engineers; John Wiley & Sons, Inc.: 2002; pp 560.
